# Supplementary material
Source: publisher figshare collection journal article supplement (https://acs.figshare.com/ndownloader/files/16991453)
Supplement: Supplementary file 1 [file 16991453]

## Supporting Information

# Is There a Negative Thermal Expansion in Supported Metal Nanoparticles?: An in Situ X-ray Absorption Study Coupled with Neural Network Analysis

*Janis Timoshenko<sup>1</sup>, Mahdi Ahmadi<sup>2</sup>, Beatriz Roldan Cuenya<sup>1,2\*</sup>*

<sup>1</sup>Department of Interface Science, Fritz-Haber-Institute of the Max Planck Society, 14195 Berlin, Germany

<sup>2</sup>Department of Physics, University of Central Florida, Orlando, FL 32816, USA

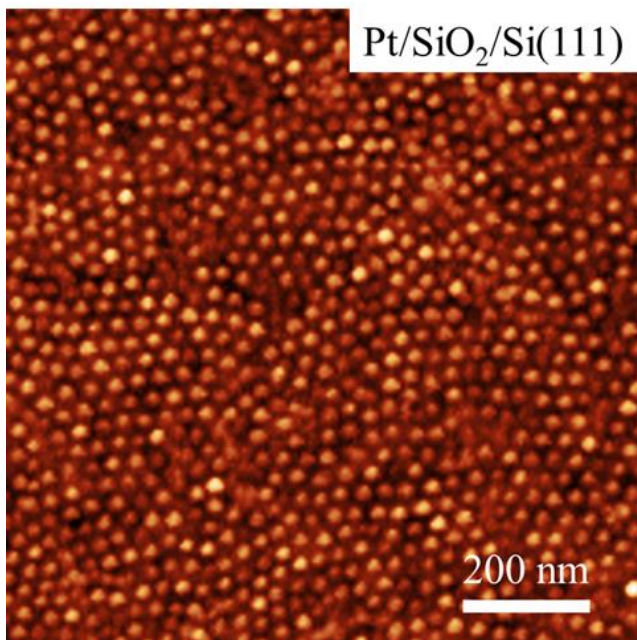

**Figure S1.**  $1 \times 1 \mu\text{m}$  AFM image of the as-prepared Pt nanoparticles (NPs) supported on SiO<sub>2</sub>/Si(111). Additional AFM images are available in Ref.[64].

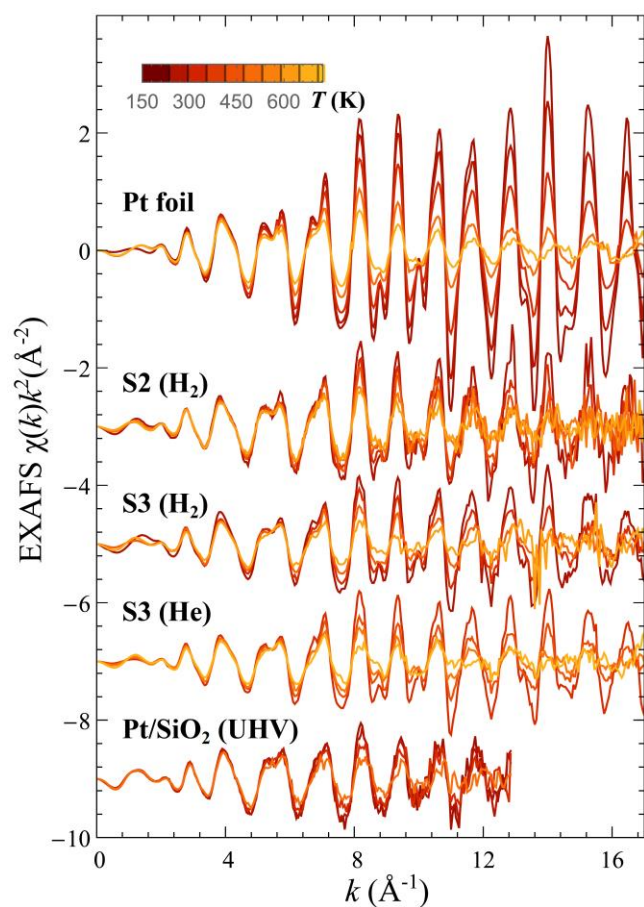

**Figure S2.** Experimental temperature-dependent Pt L<sub>3</sub>-edge EXAFS spectra for a Pt foil, Pt NPs supported on Al<sub>2</sub>O<sub>3</sub> (samples S2 and S3) and measured in H<sub>2</sub> and He atmospheres, and for Pt NPs deposited on SiO<sub>2</sub>/Si(111) and measured in UHV. Spectra are shifted vertically for clarity.

## SUPPLEMENTARY NOTE 1

The photoelectron reference energy  $E_0$  value can change from sample to sample due to, e.g., charge transfer between different parts of a multicomponent material, and may change also with temperature. In conventional EXAFS data analysis, a correction to the  $E_0$  value,  $\Delta E_0$ , is commonly used as a fitting parameter. However, the effect of  $\Delta E_0$  on EXAFS spectra correlates with that of changes in the interatomic distances and shapes of the radial distribution function (RDFs). To disentangle the effects of  $\Delta E_0$  and the RDF shape in neural network (NN)-based analysis of EXAFS spectra, during the NN training, each of ca. 50000 training EXAFS spectra is artificially shifted by a random  $\Delta E_0$  value in the range between +10 and -10 eV. In this way we ensure that the NN does not assign any physical meaning to a small shift of the energy scale in the experimental EXAFS data. To demonstrate the importance and successfulness of this solution, in Figure S3 we compare the RDFs obtained by two different NNs from experimental Pt foil EXAFS data, which were artificially shifted by  $\Delta E_0$  value in the range between +10 and -10 eV, Figure S3(a). The first NN (NN with flexible  $E_0$ ) was trained, as described above. The second NN (NN with fixed  $E_0$ ) was trained without randomized  $\Delta E_0$  during the training. As one can see from Figure S3(b,c), the NN with fixed  $E_0$  is very sensitive to misalignment of the spectra or changes in the  $E_0$  value: amplitudes, shapes and positions of the RDFs obtained vary wildly when  $\Delta E_0$  is changed in the range between -10 and +10 eV, Fig. S3(b). More importantly, even small changes in  $E_0$  (between -1.0 and +1.0 eV) result in visible differences in the shape of the RDFs (Figure S3(c)), which can affect the analysis of subtle changes in the RDFs due to thermal expansion. The NN, trained with randomized  $\Delta E_0$  values, does not have this problem. Even for large changes in the  $E_0$  values, the positions, shapes and intensities of all RDF peaks remain stable, thus this NN is ideally suited for studies of thermal expansion effects.

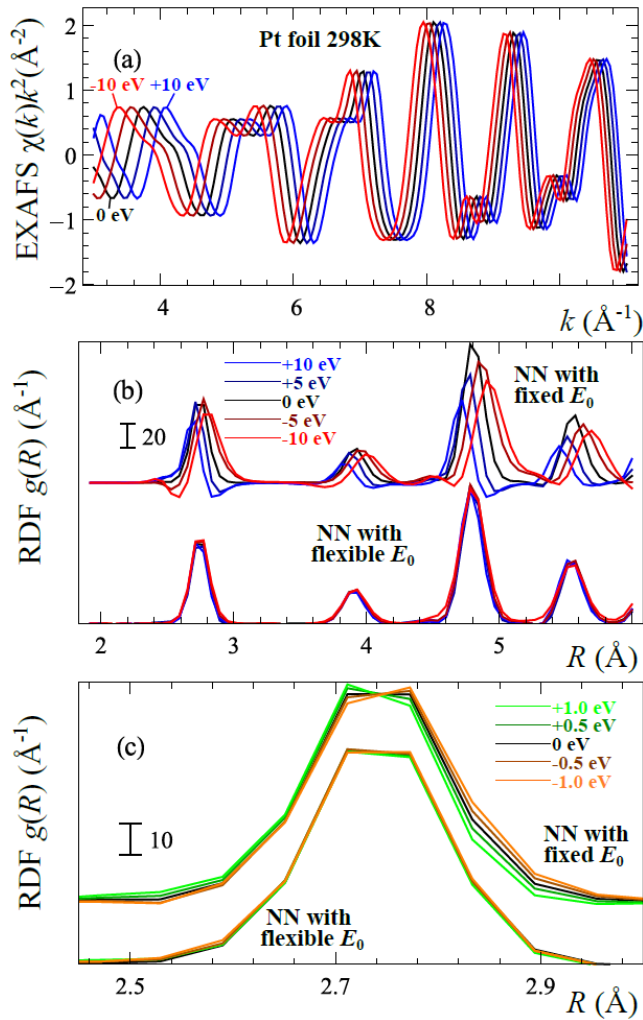

**Figure S3.** Experimental Pt L<sub>3</sub>-edge EXAFS spectra for a Pt foil (room temperature) shifted by  $\Delta E_0$  between -10 and +10 eV (a). Corresponding RDFs extracted by a NNs trained on data with fixed and flexible  $E_0$  values (b, c). For clarity, RDFs are shifted vertically in (b,c).
